# Supplementary material
Source: PubMed Central journal article supplement (PMC3696752)
Supplement: 1219809110_sapp.pdf [file 1219809110_sapp.pdf]

## Supporting Information

**McLean et al. “Candidate Phylum TM6 Genome Recovered from a Hospital Sink Biofilm Provides the First Genomic Insights into this Uncultivated Phylum “**

SI Appendix

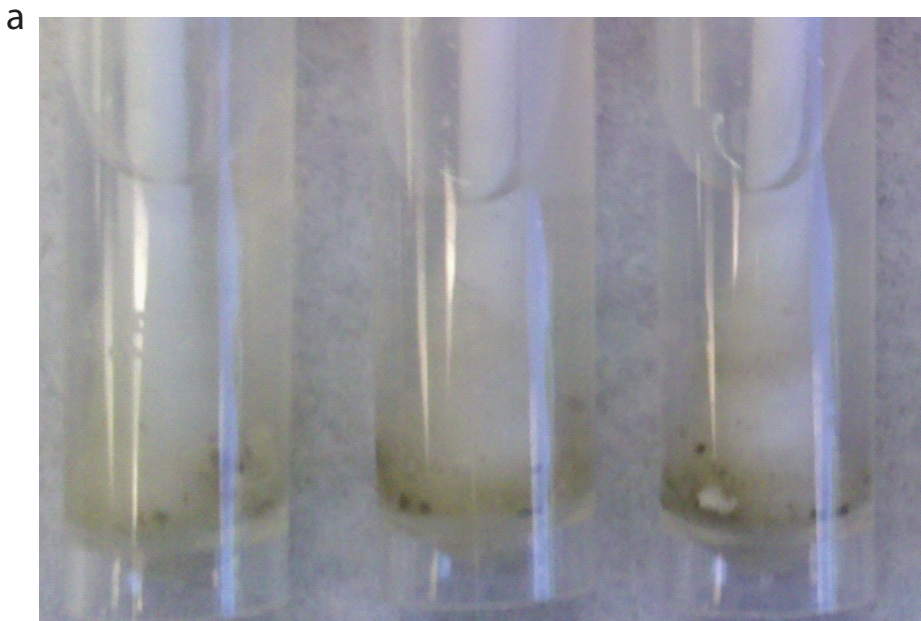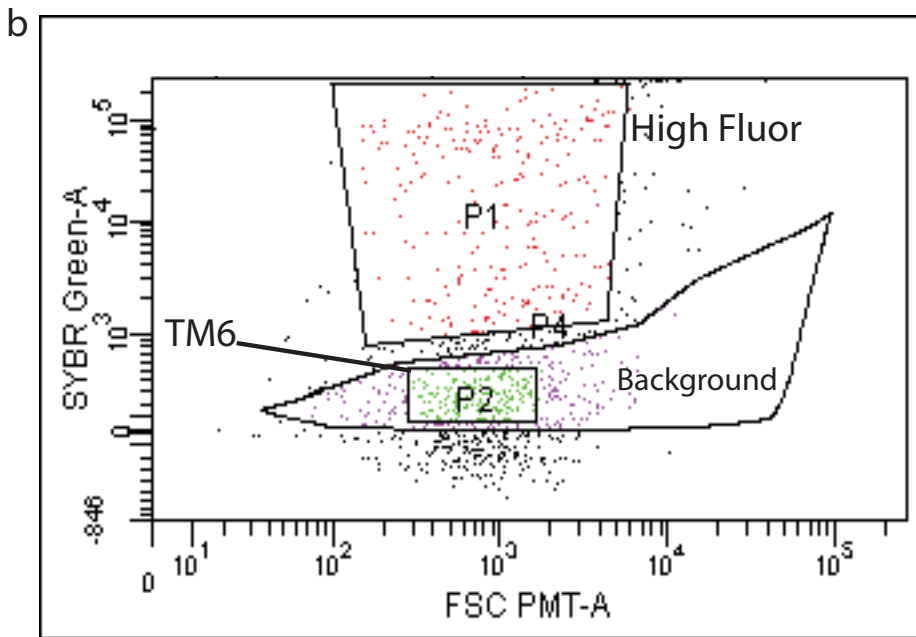

**Fig. S1. Biofilm sample biomass and Fluorescence Activated Cell Sorting (FACS) plot of a biofilm sample.** a) Sample biomass collected directly into buffer solution and from a biofilm in a sink drain within a restroom adjacent to an emergency waiting room. b) Sorting gates set to sort events after staining with SYBR Green DNA stain. The P1 gate includes high fluorescent SYBR Green stained particles, and the background gate indicates that region in which unstained sample events were located. The low fluorescent P2 region was chosen as a sort gate to target a total of 100 events in each of 32 wells of a 384 well plate.

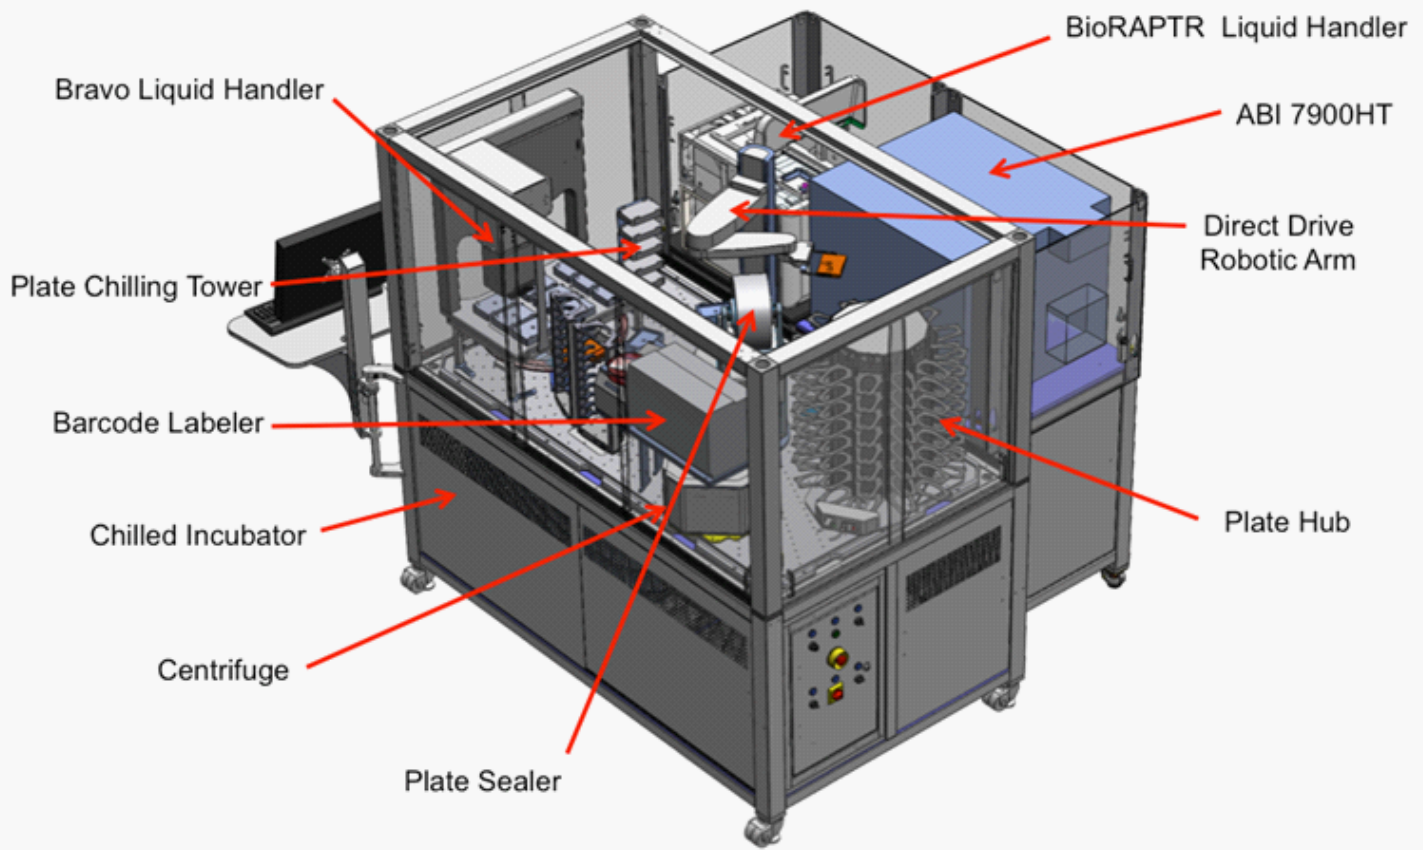

**Fig. S2. Custom integrated Agilent Technologies BioCel 1200 liquid handling automated platform for high throughput single cell genomics.** The BioCel platform allows processing of more than 5,000 single cells per week through a multi-stage protocol that includes multiple displacement amplification (MDA) of DNA, MDA dilution and 16S PCR, MDA and PCR hit picking, Picogreen (Life Technologies) DNA quantitation, 16S Syto 9 (Life Technologies) melt curve assay, 16S Taqman qPCR, and SAP/Exonuclease I (Affymetrix) PCR treatment. All liquid handling is performed on the BioCel with the BioRAPTR (Beckman Coulter) and Bravo (Agilent) performing non-contact dispensing and liquid transfer steps, respectively. The MDA isothermal reaction and PCR are performed offline on GeneAmp PCR system 9700 thermocyclers (Applied Biosystems), while TaqMan or melt curve analysis are performed in-line on the ABI 7900HT (Applied Biosystems). The platform includes barcode tracking of 384-well plates, and is integrated with a JCVI Laboratory Information Management System (LIMS).

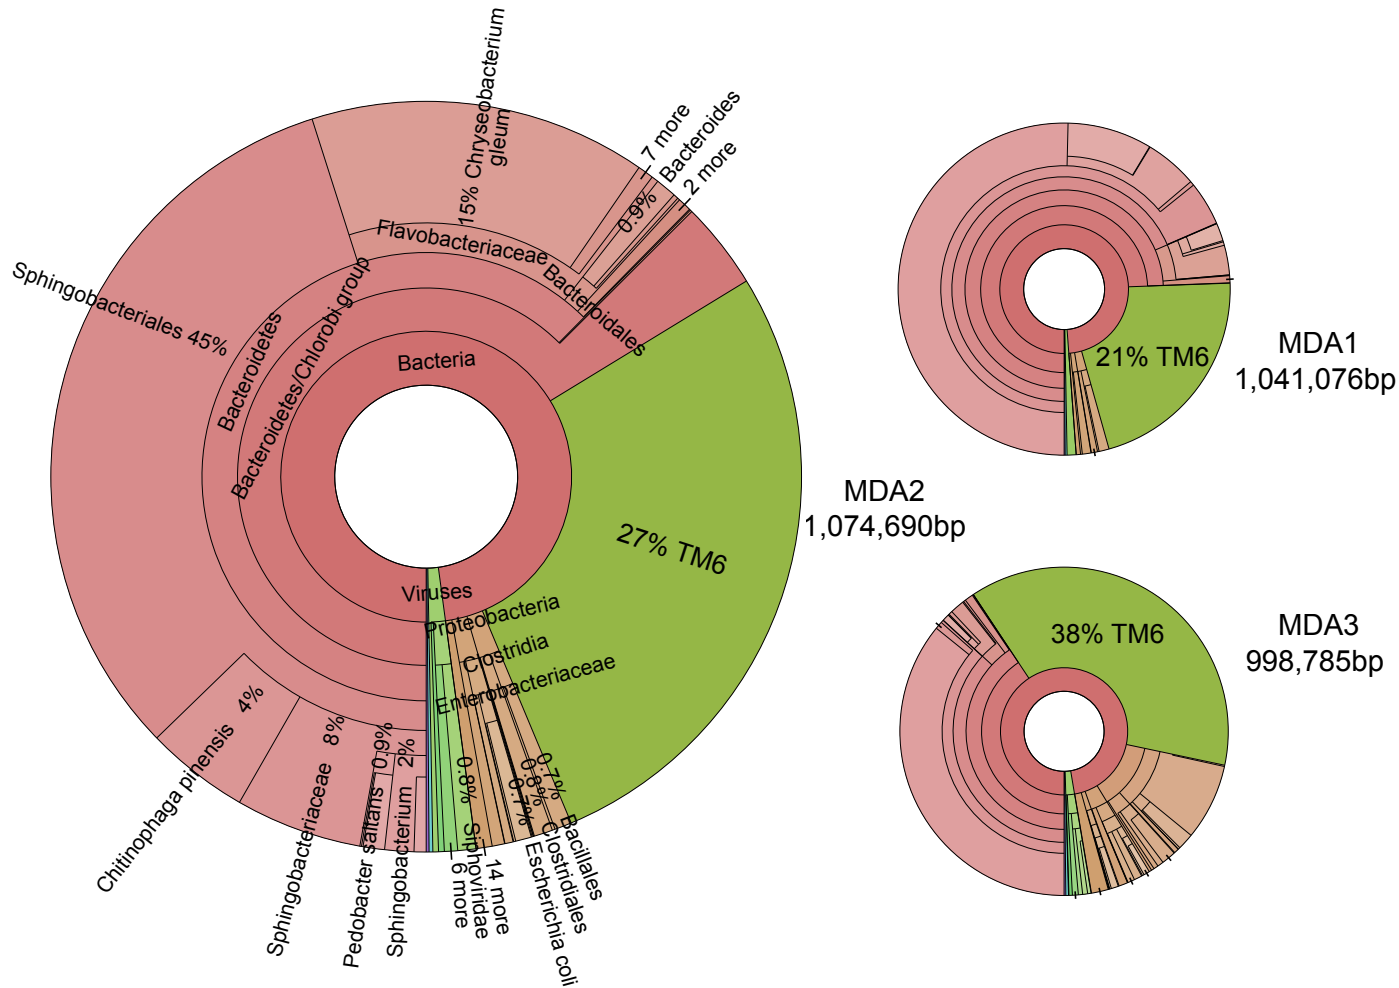

**Fig. S3. Identification of TM6 contigs in the assembled metagenome.** Taxonomic classification of assembled contigs for three independent wells representing the mini-metagenomes from 100 event sorts using MGTAXA software. A 273 kb contig containing the TM6 16S rRNA gene was used as a training sequence to generate a predictive model of nucleotide patterns for this genome. All assembled contigs were run through this pipeline and the percentage of contigs sharing similar profiles were identified and classified as belonging to TM6 (green). The total contig size representing TM6 are shown for each of the three independent amplified genomes.

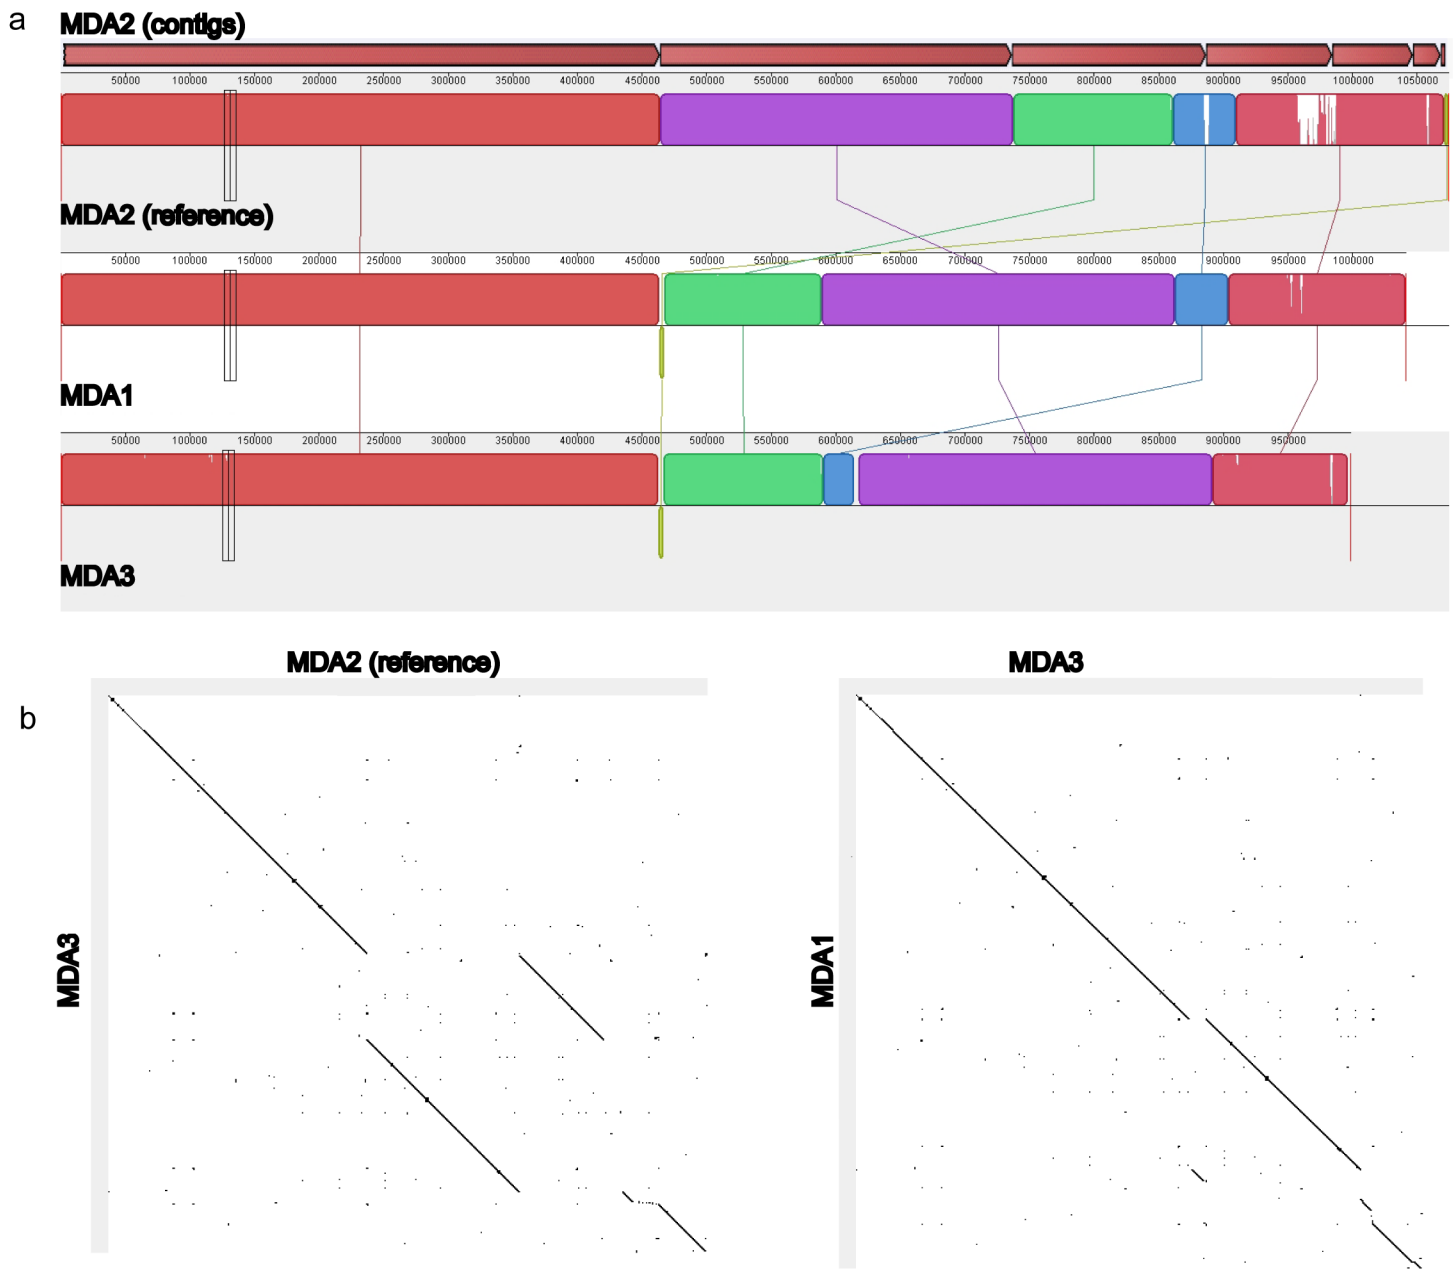

**Fig. S4. Comparison of assembled TM6 genomes from MDA1 and MDA3 datasets with the concatenated MDA2 TM6 contigs (contigs were ordered by length and then concatenated).**  
 a) Contigs for each MDA were aligned with Progressive Mauve against the concatenated MDA2 contigs. b) Similarity dotplots between the concatenated MDA2 TM6 contigs and TM6 contigs from MDA1 and MDA3.

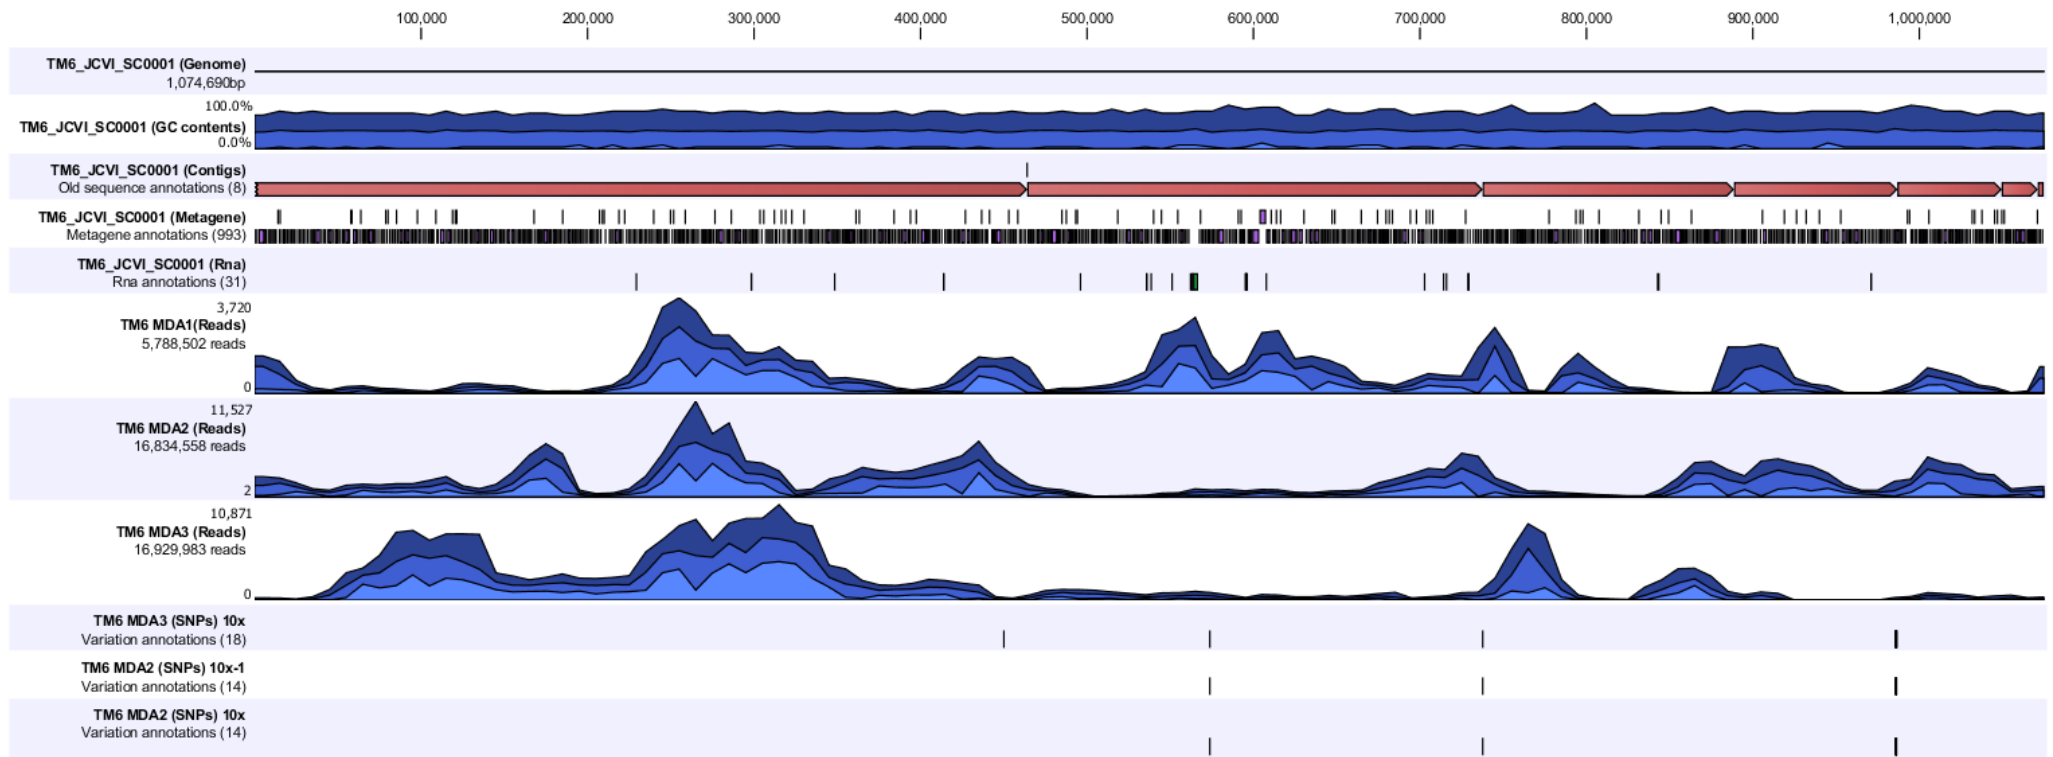

**Fig. S5. Read coverage and single nucleotide polymorphisms across the concatenated MDA2 TM6 contigs (contigs were ordered by length and then concatenated).** Row 1) Reference TM6 MDA2 contigs; Row 2) GC content; Row 3) MDA2 contigs; Row 4) CDS; Row 5) RNA genes; Row 6-8) depth of mapped Illumina reads from each amplified sample; Rows 9-11) SNPs at a cutoff of 10X coverage for each single cell amplification.

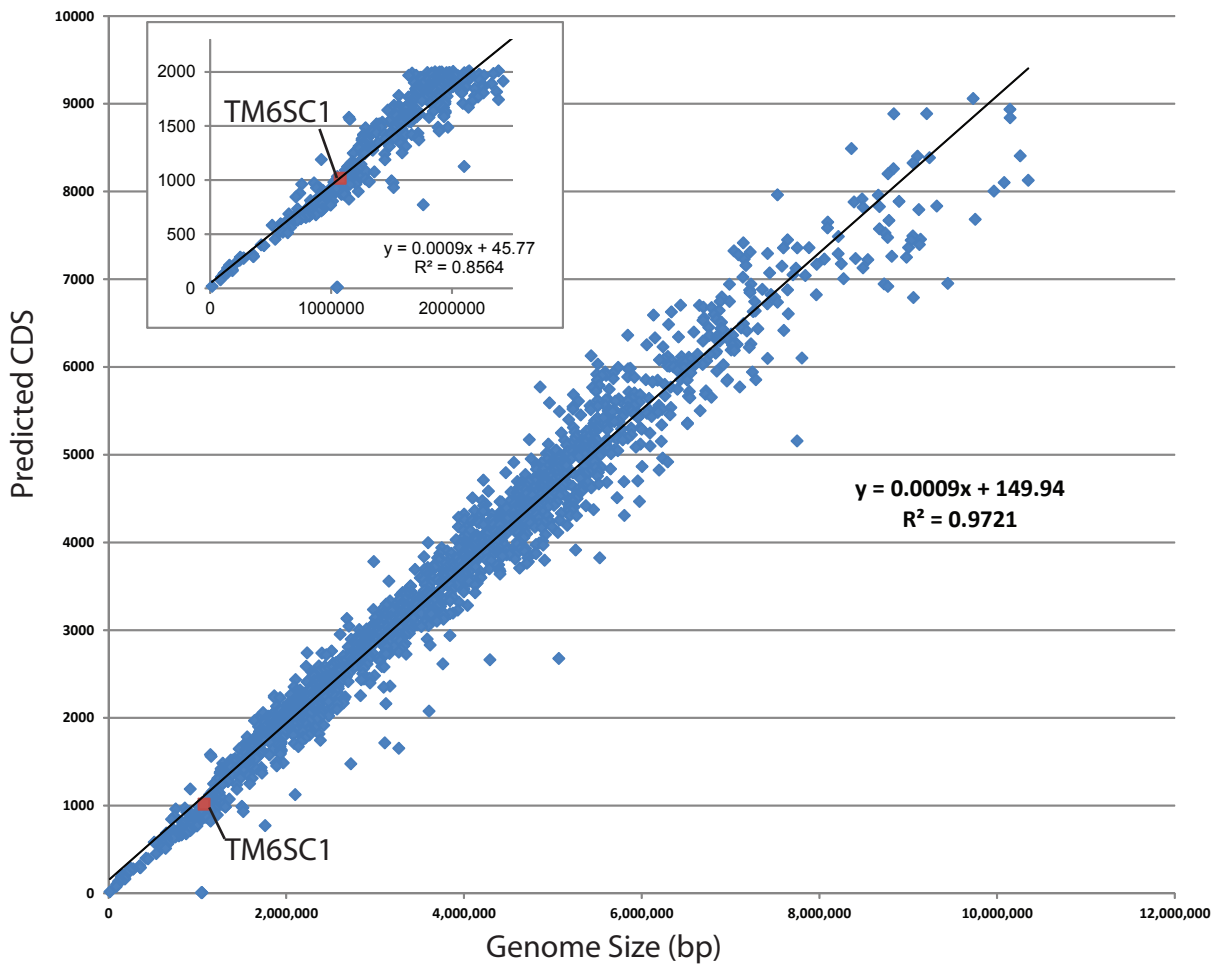

**Fig. S6. Relationships between genome size of finished bacterial genomes and the number of predicted coding DNA sequences CDS. (Inset) Small bacterial genomes that have less than 2000 predicted CDS. The TM6SC1 genome is marked in red**

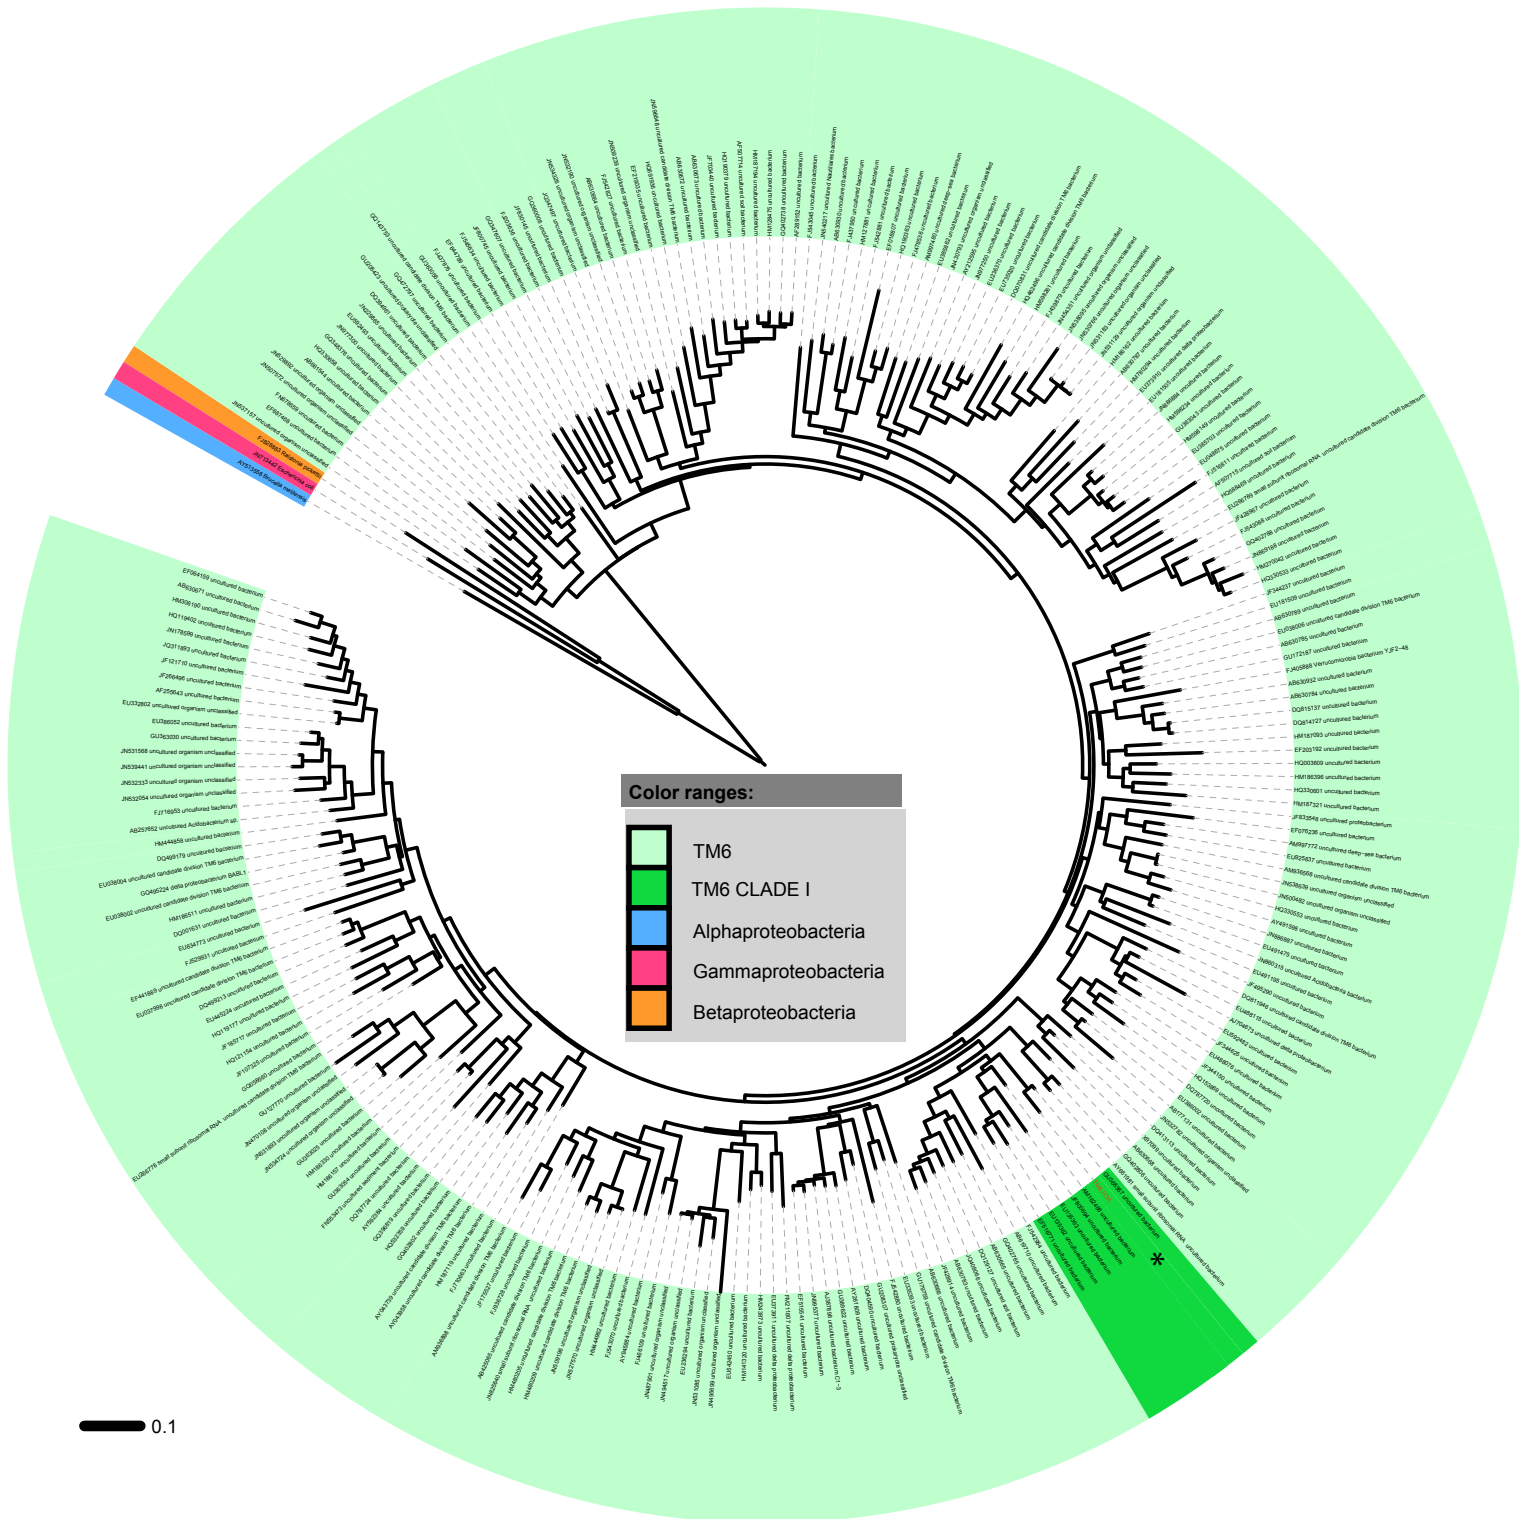

Supplemental Figure 7. Evolutionary relationships of Candidate Division TM6. a) Phylogenetic relationship of sequences in RDP designated as members of TM6 reveal the global distribution and sequence diversity within this group. \*indicates TM6 sequence from this study. Scale at bottom of figure indicates the branch length associated with 0.1 substitutions per position



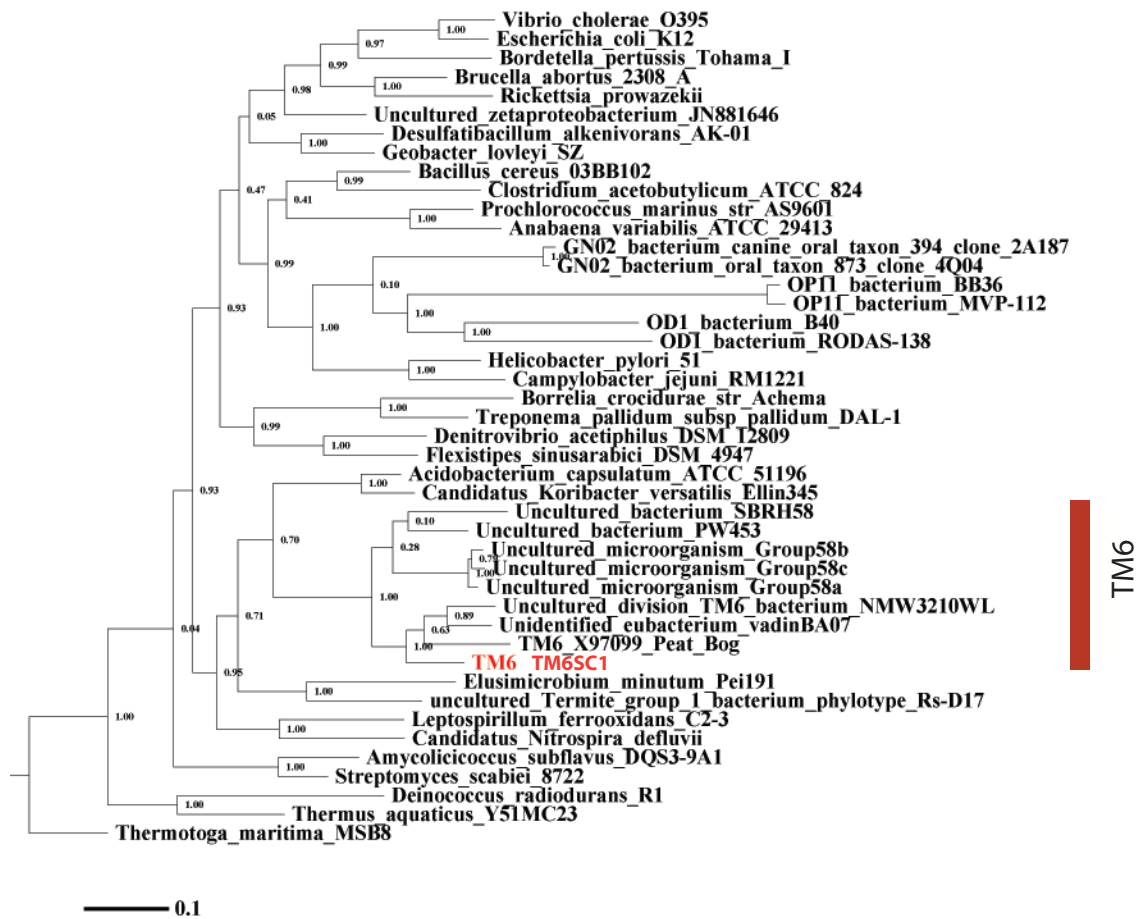

**Fig. S8. Phylogenetic tree of 16S rRNA genes of major bacterial phyla in relation to TM6SC1.** a) Maximum likelihood tree of 16S rRNA genes from representative groups of phylogenetically distinct bacteria phyla. Support values shown are phylml's aRT values, which range between 0 and 1. Scale bar indicates the branch length associated with 0.1 substitutions per position.

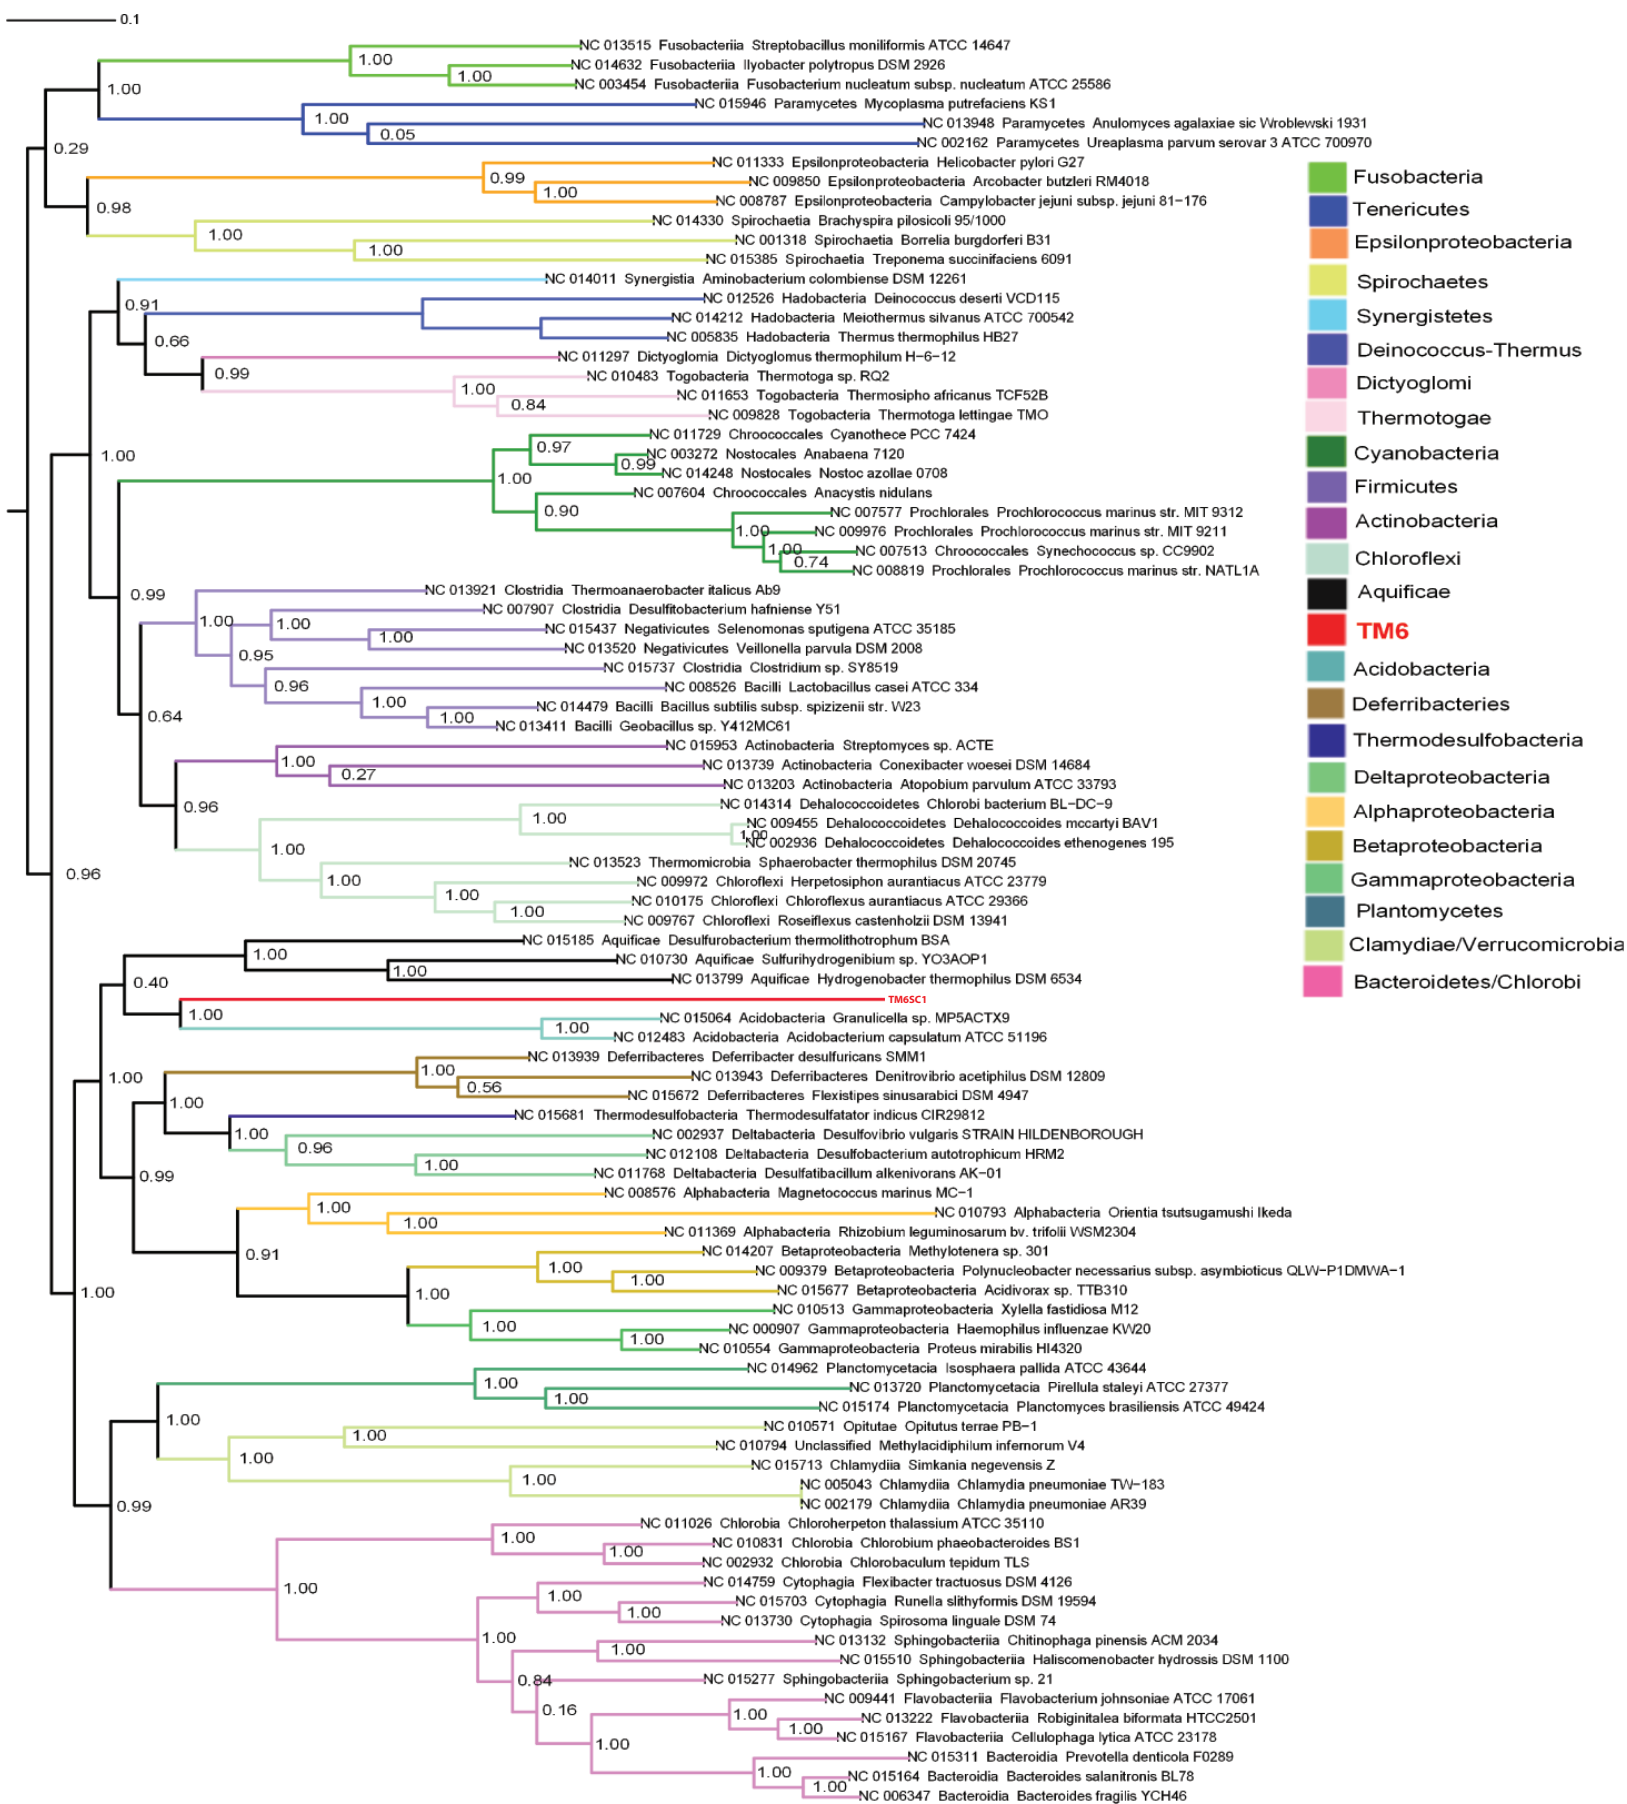

**Fig. S9. Phyml tree of major phyla.** This evolutionary distance dendrogram was constructed by aligning 29 conserved single copy genes from the TM6 genome to the AMPHORA2 seed alignments through HMM. All major phyla are separated into their monophyletic groups and highlighted by color. Support values shown are phym's aLRT values, which range between 0 and 1.

**Table S1.** Summary table of accession and publications for a number of TM6 related sequences.

| Accession | Source                   | Title                                                                                                                                                         | Reference |
|-----------|--------------------------|---------------------------------------------------------------------------------------------------------------------------------------------------------------|-----------|
| GU368367  | Copper pipe biofilm      | Culture dependent and independent analyses of bacterial communities involved in copper plumbing corrosion                                                     | 1         |
| X97099    | Peat bog                 | A molecular approach to search for diversity among bacteria in the Environment (original name derives from this study)                                        | 2         |
| EU635154  | Showerhead biofilm       | Opportunistic pathogens enriched in showerhead biofilms                                                                                                       | 3         |
| Q917125   | Drinking water           | Analysis of structure and composition of bacterial core communities in mature drinking water biofilms and bulk water of a citywide network in Germany         | 4         |
| FJ203939  | Stream biofilm           | Biofilm bacterial community structure in streams affected by acid mine drainage                                                                               | 5         |
| EU038006  | Acidic cave-wall biofilm | Episodic subaerial speleogenesis controlled by mineralogy                                                                                                     | *         |
| DQ137999  | Wetland                  | Microbial characteristics of the constructed wetland system receiving acid sulfate water                                                                      | *         |
| FJ265258  | Paddy soil               | Phylogenetic Analysis of 16S rDNA Sequences of Paddy Soil Under Long-term Fertilization                                                                       | 6         |
| FJ625572  | Forest soil              | Influence of lead contamination on bacterial community in boreal pine forest soil                                                                             | 7         |
| GU369202  | Zebra mussel             | Molecular characterization of bacterial communities within the zebra mussel ( <i>Dreissena polymorpha</i> ) in the Laurentian great lakes basin (USA)         | *         |
| GU518233  | Wastewater biofilm       | Bacterial community composition and diversity of a full-scale integrated fixed-film activated sludge system as investigated by pyrosequencing                 | 8         |
| AM162488  | Subsurface               | Vertical stratification of subsurface microbial community composition across geological formations at the Hanford Site                                        | 9         |
| AY661981  | Groundwater              | Impacts on microbial communities and cultivable isolates from groundwater contaminated with high levels of nitric acid-bearing uranium waste at the NABIR-FRC | 10        |
| AM162488  | Peat bog                 | Phylogenetic Analysis and In Situ Identification of Bacteria Community Composition in an Acidic Sphagnum Peat Bog                                             | 11        |
| JF000694  | BETEX aquifer            | Evidence of monitored natural attenuation at BTEX contaminated aquifers: analysis of catechol 2, 3-dioxygenase and toluene/biphenyl dioxygenase genes         | *         |
| EU135362  | Prairie soil             | Novelty and uniqueness patterns of rare members of the soil biosphere                                                                                         |           |
| EU135363  |                          |                                                                                                                                                               |           |
| EF516771  | Grassland soil           | Despite strong seasonal responses, soil microbial consortia are more resilient to long-term changes in rainfall than overlying grassland                      |           |
| GU179759  | Oil well                 | Microbial diversity profiles of fluids from low-temperature petroleum reservoirs with and without exogenous water perturbation                                | *         |
| EU335393  | Soil                     | Changes in bacterial and archaeal community structure and functional diversity along a geochemically variable soil profiles                                   |           |
| DQ413113  | SBR reactor              | Comparative analysis of microbial communities from culture-dependent and – independent approaches in an anaerobic/aerobic SBR reactor                         | *         |
| JN532616  | Hypersaline mat          | Phylogenetic stratigraphy in the Guerrero Negro hypersaline microbial mat                                                                                     | *         |
| JN532616  |                          |                                                                                                                                                               |           |
| AB630668  | Aquatic moss pillars     | MicroXorae of aquatic moss pillars in a freshwater lake, East Antarctica, based on fatty acid and 16S rRNA gene analyses                                      |           |
| GQ402806  | Peat swamp forest soil   | Insights into the phylogeny and metabolic potential of a primary tropical peat swamp forest microbial community by metagenomic analysis                       |           |
| JF301303  | Forest soil              | Fungal and bacterial communities in relation to gradients of pH and N supply in boreal forest soils                                                           | *         |

. Unpublished Genbank record

## REFERENCES

1. Pavissich, J., Vargas, I., González, B., Pastén, P. & Pizarro, G. Culture dependent and independent analyses of bacterial communities involved in copper plumbing corrosion. *Journal of applied microbiology* **109**, 771-853 (2010).
  2. Rheims, H. & Rainey..., F. A molecular approach to search for diversity among bacteria in the environment. *Journal of Industrial Microbiology ...* (1996).
  3. Feazel, L.M. et al. Opportunistic pathogens enriched in showerhead biofilms. *Proceedings of the National Academy of Sciences* **106** (2009).
  4. Henne, K., Kahlisch, L., Brettar, I. & Höfle, M. Analysis of structure and composition of bacterial core communities in mature drinking water biofilms and bulk water of a citywide network in Germany. *Applied and environmental microbiology* **78**, 3530-3538 (2012).
  5. Lear, G., Niyogi, D., Harding, J., Dong, Y. & Lewis, G. Biofilm bacterial community structure in streams affected by acid mine drainage. *Applied and environmental microbiology* **75**, 3455-3515 (2009).
  6. Wu, M., Qin, H., Chen, Z., Wu, J. & Wei, W. Effect of long-term fertilization on bacterial composition in rice paddy soil. *Biology and Fertility of Soils* **47**, 397-802 (2011).
  7. Hui, N. et al. Influence of lead on organisms within the detritus food web of a contaminated pine forest soil. *Boreal Environ. Res* **14**, 70-155 (2009).
  8. Kwon, S., Kim, T.-S., Yu, G., Jung, J.-H. & Park, H.-D. Bacterial community composition and diversity of a full-scale integrated fixed-film activated sludge system as investigated by pyrosequencing. *Journal of microbiology and biotechnology* **20**, 1717-1740 (2010).
  9. Lin, X., Kennedy, D., Fredrickson, J., Bjornstad, B. & Konopka, A. Vertical stratification of subsurface microbial community composition across geological formations at the Hanford Site. *Environmental microbiology* **14**, 414-439 (2012).
  10. Fields, M. et al. Impacts on microbial communities and cultivable isolates from groundwater contaminated with high levels of nitric acid-uranium waste. *FEMS microbiology ecology* **53**, 417-445 (2005).
  11. Dedysh, S., Pankratov, T., Belova, S., Kulichevskaya, I. & Liesack, W. Phylogenetic analysis and in situ identification of bacteria community composition in an acidic Sphagnum peat bog. *Applied and environmental microbiology* **72**, 2110-2117 (2006).
-

**Table S2. Conserved single copy gene list (111) and presence within TM6SC1 genome.**

| Conserved Genes (111) |           | TM6 genome | Conserved Genes (111) |           | TM6 genome |
|-----------------------|-----------|------------|-----------------------|-----------|------------|
|                       | HMM       |            |                       | HMM       |            |
| cgtA                  | TIGR02729 | -          | pyrG                  | TIGR00337 | +          |
| coaE                  | TIGR00152 | -          | recA                  | TIGR02012 | +          |
| fnt                   | TIGR00460 | -          | rfaA                  | TIGR00082 | +          |
| ligA                  | TIGR00575 | -          | rplA                  | TIGR01169 | +          |
| pgk                   | PF00162   | -          | rplB                  | TIGR01171 | +          |
| pheT                  | TIGR00472 | -          | rplC                  | PF00297   | +          |
| proS                  | TIGR00409 | -          | rplD                  | PF00573   | +          |
| rnc                   | TIGR02191 | -          | rplE                  | PF00281   | +          |
| rpoC                  | TIGR02387 | -          | rplF                  | PF00347   | +          |
| secE                  | TIGR00964 | -          | rplI                  | TIGR00158 | +          |
| dnaK                  | TIGR02350 | +          | rplJ                  | PF00466   | +          |
| ffh                   | TIGR00959 | +          | rplK                  | TIGR01632 | +          |
| glyS                  | TIGR00388 | +          | rplL                  | TIGR00855 | +          |
| glyS                  | TIGR00389 | +          | rplM                  | TIGR01066 | +          |
| gmk                   | TIGR03263 | +          | rplN                  | TIGR01067 | +          |
| gyrB                  | TIGR01059 | +          | rplO                  | TIGR01071 | +          |
| ksgA                  | TIGR00755 | +          | rplP                  | TIGR01164 | +          |
| proS                  | TIGR00408 | +          | rplQ                  | TIGR00059 | +          |
| rpoC                  | TIGR02386 | +          | rplR                  | TIGR00060 | +          |
| uvrB                  | TIGR00631 | +          | rplS                  | TIGR01024 | +          |
| prfA                  | TIGR00019 | +          | rplT                  | TIGR01032 | +          |
| alaS                  | TIGR00344 | +          | rplU                  | TIGR00061 | +          |
| argS                  | PF00750   | +          | rplV                  | TIGR01044 | +          |
| aspS                  | TIGR00459 | +          | rplW                  | PF00276   | +          |
| cysS                  | TIGR00435 | +          | rplX                  | TIGR01079 | +          |
| dnaA                  | TIGR00362 | +          | rpmA                  | TIGR00062 | +          |
| dnaG                  | TIGR01391 | +          | rpmB                  | TIGR00009 | +          |
| dnaN                  | TIGR00663 | +          | rpmC                  | TIGR00012 | +          |
| dnaX                  | TIGR02397 | +          | rpmF                  | TIGR01031 | +          |
| engA                  | TIGR03594 | +          | rpmH                  | TIGR01030 | +          |
| era                   | TIGR00436 | +          | rpmI                  | TIGR00001 | +          |
| ftr                   | TIGR00496 | +          | rpoA                  | TIGR02027 | +          |
| ftsY                  | TIGR00064 | +          | rpoB                  | TIGR02013 | +          |
| grpE                  | PF01025   | +          | rpsB                  | TIGR01011 | +          |
| gyrA                  | TIGR01063 | +          | rpsC                  | TIGR01009 | +          |
| hisS                  | TIGR00442 | +          | rpsD                  | TIGR01017 | +          |
| ileS                  | TIGR00392 | +          | rpsE                  | TIGR01021 | +          |
| infB                  | TIGR00487 | +          | rpsF                  | TIGR00166 | +          |
| infC                  | TIGR00168 | +          | rpsG                  | TIGR01029 | +          |
| lepA                  | TIGR01393 | +          | rpsH                  | PF00410   | +          |
| leuS                  | TIGR00396 | +          | rpsI                  | PF00380   | +          |
| mnmA                  | TIGR00420 | +          | rpsJ                  | TIGR01049 | +          |
| mraW                  | PF01795   | +          | rpsK                  | PF00411   | +          |
| nusA                  | TIGR01953 | +          | rpsL                  | TIGR00981 | +          |
| nusG                  | TIGR00922 | +          | rpsM                  | PF00416   | +          |
| pheS                  | TIGR00468 | +          | rpsO                  | TIGR00952 | +          |
| pheT                  | TIGR00472 | +          | rpsP                  | TIGR00002 | +          |
| rpsT                  | TIGR00029 | +          | rpsQ                  | PF00366   | +          |
| secA                  | TIGR00963 | +          | rpsR                  | TIGR00165 | +          |
| secG                  | TIGR00810 | +          | rpsS                  | TIGR01050 | +          |
| secY                  | TIGR00967 | +          |                       |           |            |
| serS                  | TIGR00414 | +          |                       |           |            |
| smpB                  | TIGR00086 | +          |                       |           |            |
| thrS                  | TIGR00418 | +          |                       |           |            |
| tig                   | TIGR00115 | +          |                       |           |            |
| tilS                  | TIGR02432 | +          |                       |           |            |
| tsf                   | TIGR00116 | +          |                       |           |            |
| tyrS                  | TIGR00234 | +          |                       |           |            |
| valS                  | TIGR00422 | +          |                       |           |            |
| ybeY                  | TIGR00043 | +          |                       |           |            |
| ychF                  | TIGR00092 | +          |                       |           |            |

**Table S3.** Putative proteins with unique features in the TM6 genome.

| Name, NCBI accession No.                            | Putative function                                                                                                                    |
|-----------------------------------------------------|--------------------------------------------------------------------------------------------------------------------------------------|
| <b><i>Sporulation related</i></b>                   |                                                                                                                                      |
| SpoIID/LytB domain-containing protein, ACM21796     | Important for membrane migration and early steps of engulfment during endospore formation                                            |
| spoVG, ADK84098                                     | Control of sporulation initiation and cell division                                                                                  |
| <b><i>Cell surface binding protein</i></b>          |                                                                                                                                      |
| Ricin Lectin B <sup>(1)</sup> , ABX04072            | Binds to carbohydrates                                                                                                               |
| <b><i>Competence protein and related</i></b>        |                                                                                                                                      |
| PilM, ACM21413                                      | Type IV pilus assembly protein                                                                                                       |
| ComEC/Rec2, ACL70042                                | Multi-membrane protein involved in DNA internalization                                                                               |
| <b><i>Secretion proteins</i></b>                    |                                                                                                                                      |
| Protein D, CAE79475                                 | Type II and III secretion system proteins                                                                                            |
| Protein D precursor, EAT1437                        | Type II and III secretion system proteins                                                                                            |
| <b><i>Virulence</i></b>                             |                                                                                                                                      |
| Streptomycin-6-phosphotransferase, BAG40005         | Antibiotic inactivation                                                                                                              |
| CarD family transcription regulator, AAS96050       | Homologues to transcription regulator LtpA, exclusively expressed during <i>Borrelia burgdorferi</i> cultivation <sup>(2)</sup>      |
| GroEL and GroES co-chaperonins, ACY19055            | Bacteriophages T4 and RB49 proteins Gp31 and RB-49                                                                                   |
| Clostripain peptidase C11, ABB31446                 | Cystein protease domain performs proteolysis of host protein. A CPDmartx protein present in pathogenic Proteobacteria <sup>(3)</sup> |
| Phage spo1 DNA polymerase related protein, ADR36304 | Induces viral DNA Polymerase activity during bacterial infection <sup>(4)</sup>                                                      |
| OMP18 outer membrane protein, SBK83275              | Serologic detector for <i>Helicobacter</i> infection <sup>(5)</sup>                                                                  |
| Putative CRISPR XR138021                            | Identical repeats (TTTCAAAGTTATCCACC) encoding a putative disease resistance protein                                                 |

**Table S4. Proteins related to Archaea. BLASTP hits longer than 50 aa with greater than 50% sequence identity were included.**

| <b>Closest matching Organism (MG-RAST)</b>   | <b>Fragment size (bp)</b> | <b>KEGG Function</b>           | <b>E-value</b> | <b>Sequence Identity</b> |
|----------------------------------------------|---------------------------|--------------------------------|----------------|--------------------------|
| <i>Pyrobaculum arsenaticum</i>               | (422 bp)                  | NUDIX hydrolase                | 1E-35          | 91/137 (66%)             |
| <i>Archaeoglobus profundus</i>               | (1577 bp)                 | AMP-dep. synthetase and ligase | 4E-04          | 21/31 (68%)              |
| <i>Desulfurubacterium thermolithotrophum</i> | (1844 bp)                 | Amino transferase              | 1E-152         | 356/562 (63%)            |
| <i>Pyrococcus furiosus</i>                   | (1310 bp)                 | Deaminase                      | 8E-07          | 101/126 (80%)            |
| <i>Methanococcus voltae</i> A3               | (1703 bp)                 | CTP synthase                   | 7E-179         | 367/553 (66%)            |
| <i>Candidatus Nitrosoarchaeum</i>            | (962 bp)                  | Translation factor SUA5        | 1E-85          | 204/326 (63%)            |

Table S5. Taxonomic classification of CDS within TM6SC1 to known symbiotic organisms.

| Common name                                                            | TAXON                                                           | EVIDENCE         | gene_symbol | E.C.      |
|------------------------------------------------------------------------|-----------------------------------------------------------------|------------------|-------------|-----------|
| hypothetical protein                                                   | <i>Wolbachia endosymbiont strain TRS of Brugia malayi</i>       | UniRef100_Q5GS46 |             |           |
| conserved putative membrane protein                                    | <i>Waddlia chondrophila WSU 86-1044</i>                         | UniRef100_D6YTP4 |             |           |
| hypothetical protein                                                   | <i>Waddlia chondrophila WSU 86-1044</i>                         | UniRef100_D6YV77 | cpsT        |           |
| methionyl aminopeptidase                                               | <i>uncultured Termite group 1 bacterium phylotype Rs-D17</i>    | UniRef100_B1GZA4 |             | 3.4.11.18 |
| ribosomal protein L16                                                  | <i>uncultured Termite group 1 bacterium phylotype Rs-D17</i>    | TIGR01164        | rplP        |           |
| triose-phosphate isomerase                                             | <i>Rickettsiella grylli</i>                                     | PF00121          | tpiA        | 5.3.1.1   |
| valine--tRNA ligase                                                    | <i>Rickettsia prowazekii</i>                                    | TIGR00422        | valS        | 6.1.1.9   |
| tolQ protein                                                           | <i>Rickettsia peacockii str. Rustic</i>                         | UniRef100_C4K1W3 |             |           |
| AAA+ superfamily protein                                               | <i>Rickettsia endosymbiont of Ixodes scapularis</i>             | UniRef100_C4YVA4 |             |           |
| phosphohydrolase                                                       | <i>Rickettsia endosymbiont of Ixodes scapularis</i>             | UniRef100_C4YYI5 |             |           |
| AAA+ superfamily protein                                               | <i>Rickettsia bellii RML369-C</i>                               | UniRef100_Q1RJW9 |             |           |
| trigger factor                                                         | <i>Rickettsia akari str. Hartford</i>                           | UniRef100_A8GQ54 | tig         |           |
| hypothetical protein                                                   | <i>Planctomyces maris DSM 8797</i>                              | UniRef100_A6CGG7 |             |           |
| oxidoreductase, zinc-binding dehydrogenase family protein              | <i>Planctomyces maris DSM 8797</i>                              | UniRef100_A6C733 |             |           |
| hypothetical protein                                                   | <i>Parachlamydia acanthamoebae str. Hall's coccus</i>           | UniRef100_D1R7K7 |             |           |
| hypothetical protein                                                   | <i>Parachlamydia acanthamoebae str. Hall's coccus</i>           | UniRef100_D1R7L0 |             |           |
| hypothetical protein                                                   | <i>Parachlamydia acanthamoebae str. Hall's coccus</i>           | UniRef100_D1R6G7 |             |           |
| hypothetical protein                                                   | <i>Parachlamydia acanthamoebae str. Hall's coccus</i>           | UniRef100_D1R7D6 |             |           |
| hypothetical protein                                                   | <i>Parachlamydia acanthamoebae str. Hall's coccus</i>           | UniRef100_D1RAY7 |             |           |
| hypothetical protein                                                   | <i>Parachlamydia acanthamoebae str. Hall's coccus</i>           | UniRef100_D1R681 |             |           |
| hypothetical protein                                                   | <i>Parachlamydia acanthamoebae str. Hall's coccus</i>           | UniRef100_D1R6G6 |             |           |
| hypothetical protein                                                   | <i>Parachlamydia acanthamoebae str. Hall's coccus</i>           | UniRef100_D1RA48 |             |           |
| hypothetical protein                                                   | <i>Parachlamydia acanthamoebae str. Hall's coccus</i>           | UniRef100_D1R681 |             |           |
| hypothetical protein                                                   | <i>Parachlamydia acanthamoebae str. Hall's coccus</i>           | UniRef100_D1R7K7 |             |           |
| hypothetical protein                                                   | <i>Parachlamydia acanthamoebae str. Hall's coccus</i>           | UniRef100_D1RBI5 |             |           |
| hypothetical protein                                                   | <i>Parachlamydia acanthamoebae str. Hall's coccus</i>           | UniRef100_D1RBK2 |             |           |
| UPF0235 protein pah_c178o054                                           | <i>Parachlamydia acanthamoebae str. Hall's coccus</i>           | UniRef100_D1R9K8 |             |           |
| glycosyltransferase, family 2                                          | <i>Mycobacterium vanbaalenii PYR-1</i>                          | UniRef100_A1T4K0 |             |           |
| pyridine nucleotide-disulfide oxidoreductase                           | <i>Mycobacterium leprae</i>                                     | PF07992          | trxB        |           |
| 16S rRNA methyltransferase gidB                                        | <i>Listeria seeligeri serovar 1/2b str. SLCC3954</i>            | TIGR00138        | gidB        | 2.1.--    |
| flavin containing amine oxidoreductase                                 | <i>Legionella pneumophila str. Paris</i>                        | PF01593          |             |           |
| tipAS antibiotic-recognition domain                                    | <i>Legionella pneumophila str. Paris</i>                        | PF07739          |             |           |
| hypothetical protein                                                   | <i>Legionella pneumophila str. Lens</i>                         | UniRef100_Q5WZY4 |             |           |
| hypothetical protein                                                   | <i>Legionella pneumophila str. Corby</i>                        | UniRef100_A5IFS2 |             |           |
| hypothetical protein                                                   | <i>Legionella longbeachae</i>                                   | UniRef100_D3HJQ2 |             |           |
| similar to chloroperoxidase                                            | <i>Legionella longbeachae</i>                                   | UniRef100_D3HSL9 | cpo         | 1.11.1.10 |
| histone methylation protein DOT1                                       | <i>Legionella drancourtii LLAP12</i>                            | PF08123          |             |           |
| hypothetical protein                                                   | <i>Legionella drancourtii LLAP12</i>                            | UniRef100_C6MZA6 |             |           |
| putative dioxygenase                                                   | <i>Coxiella burnetii RSA 334</i>                                | UniRef100_A9ZH77 |             |           |
| hypothetical protein                                                   | <i>Coxiella burnetii</i>                                        | UniRef100_A9KCX7 |             |           |
| ribonucleoside-diphosphate reductase subunit beta                      | <i>Chlamydia muridarum</i>                                      | UniRef100_Q9PL92 | nrdB        | 1.17.4.1  |
| uncharacterized protein TC_0114                                        | <i>Chlamydia muridarum</i>                                      | UniRef100_Q9PLI5 |             |           |
| uncharacterized protein TC_0114                                        | <i>Chlamydia muridarum</i>                                      | UniRef100_Q9PLI5 |             |           |
| D-ala D-ala ligase N-terminal domain protein                           | <i>Candidatus Protochlamydia amoebophila UWE25</i>              | PF01820          | ddlA        |           |
| hypothetical protein                                                   | <i>Candidatus Protochlamydia amoebophila UWE25</i>              | UniRef100_Q6MA51 |             |           |
| hypothetical protein                                                   | <i>Candidatus Protochlamydia amoebophila UWE25</i>              | UniRef100_Q6MD30 |             |           |
| hypothetical protein                                                   | <i>Candidatus Protochlamydia amoebophila UWE25</i>              | UniRef100_Q6MA19 |             |           |
| hypothetical protein                                                   | <i>Candidatus Protochlamydia amoebophila UWE25</i>              | UniRef100_Q6MA19 |             |           |
| probable sodium/proline symporter                                      | <i>Candidatus Protochlamydia amoebophila UWE25</i>              | UniRef100_Q6MAG0 | putP        |           |
| putative branched-chain amino acid transport system II carrier protein | <i>Candidatus Protochlamydia amoebophila UWE25</i>              | UniRef100_Q6MD58 | braB        |           |
| putative sodium/pantothenate symporter (pantothenate permease)         | <i>Candidatus Protochlamydia amoebophila UWE25</i>              | UniRef100_Q6MA53 | panF        |           |
| tRNA-guanine transglycosylase                                          | <i>Candidatus Protochlamydia amoebophila UWE25</i>              | TIGR00430        | tgt         | 2.4.2.29  |
| holliday junction DNA helicase ruvB                                    | <i>Candidatus Hamiltonella defensa 5AT (Acyrtosiphon pisum)</i> | TIGR00635        | ruvB        | 3.6.1.-   |
| tRNA nucleotidyltransferase                                            | <i>Candidatus Hamiltonella defensa 5AT (Acyrtosiphon pisum)</i> | UniRef100_C4K3X0 | rph         | 2.7.7.56  |
| hypothetical protein                                                   | <i>Candidatus Amoebophilus asiaticus 5a2</i>                    | UniRef100_B3EU24 |             |           |
| hypothetical protein                                                   | <i>Candidatus Amoebophilus asiaticus 5a2</i>                    | UniRef100_B3ETM4 |             |           |
| hypothetical protein                                                   | <i>Candidatus Amoebophilus asiaticus 5a2</i>                    | UniRef100_B3ETM4 |             |           |
| MutS domain V protein                                                  | <i>Candidatus Amoebophilus asiaticus 5a2</i>                    | PF00488          |             |           |
| putative ABC transporter ATP-binding subunit                           | <i>Burkholderia pseudomallei</i>                                | UniRef100_Q63Q81 |             |           |
| amino acid permease-associated region                                  | <i>Burkholderia multivorans ATCC 17616</i>                      | UniRef100_A9AKF8 |             |           |
| DNA polymerase ligD, polymerase domain                                 | <i>Bradyrhizobium sp. BTAi1</i>                                 | TIGR02778        | ligD        |           |
| blt2851 protein                                                        | <i>Bradyrhizobium japonicum</i>                                 | UniRef100_Q89RC1 |             |           |
| ribosomal protein L17                                                  | <i>Borrelia turicatae 91E135</i>                                | TIGR00059        | rplQ        |           |
| tRNA (5-methylaminomethyl-2-thiouridylate)-methyltransferase           | <i>Borrelia hermsii DAH</i>                                     | TIGR00420        | trmU        | 2.1.1.61  |
| 1-acyl-sn-glycerol-3-phosphate acyltransferase                         | <i>Borrelia duttonii Ly</i>                                     | UniRef100_B5RKT9 | plsC        |           |
